# Supplementary material for: Ultrasonic-Assisted Extraction of Dictyophora rubrovolvata Volva Proteins: Process Optimization, Structural Characterization, Intermolecular Forces, and Functional Properties
Source: MDPI journal article supplement (doi:10.3390/foods13081265), 2024-04-20
Supplement: s1 [file s1]

# Supporting Information

## Ultrasonic Assisted Extraction of *Dictyophora rubrovolvata* Volva Proteins: Process Optimization,

### Structural Characterization, Intermolecular Forces, and Functional Properties

Yongqing Zhang<sup>a</sup>, Shinan Wei<sup>b</sup>, Qinqin Xiong<sup>b</sup>, Lingshuai Meng<sup>a</sup>, Ying Li<sup>a</sup>, Yonghui Ge<sup>a</sup>,

Ming Guo<sup>c</sup>, Heng Luo<sup>b,\*\*</sup>, Dong Lin<sup>a,\*</sup>

<sup>a</sup>Guizhou Higher Education Key Laboratory of Functional Food, Guizhou Engineering Research Center for Fruit Processing, College of Food Science and Engineering, Guiyang University, Guiyang 550005, China

<sup>b</sup>State Key Laboratory of Functions and Applications of Medicinal Plants, Guizhou Medical University, Guiyang 550014, China.

<sup>c</sup>Guizhou Jin Chan Da Shan Biotechnology Company Limited, Nayong 553300, China

\*Corresponding author. College of Food Science and Engineering, Guiyang University, Guiyang 550005, China.

\*\* Corresponding author. State Key Laboratory of Functions and Applications of Medicinal Plants, Guizhou Medical University, Guiyang 550014, China.

E-mail addresses: gyulindong@gyu.edu.cn (D. Lin), luo\_heng@gmc.edu.cn (H. Luo).

**Table S1.** The factors and levels of the orthogonal test

| Factors                       | Levels |      |      |
|-------------------------------|--------|------|------|
|                               | 1      | 2    | 3    |
| A. pH                         | 10     | 10.5 | 11   |
| B. Time (min)                 | 20     | 25   | 30   |
| C. Ultrasonic power (W)       | 440    | 495  | 550  |
| D. Material to solvent (g/mL) | 1:15   | 1:20 | 1:25 |

**Table S2.** Orthogonal array design with experimental results

| No.            | A     | B     | C     | D     | Proteins extraction rate (%) |
|----------------|-------|-------|-------|-------|------------------------------|
| 1              | 10    | 20    | 440   | 1:15  | 30.81±0.93                   |
| 2              | 10    | 25    | 495   | 1:20  | 33.84±1.05                   |
| 3              | 10    | 30    | 550   | 1:25  | 35.93±1.49                   |
| 4              | 10.5  | 20    | 495   | 1:25  | 35.75±0.96                   |
| 5              | 10.5  | 25    | 550   | 1:15  | 38.11±1.69                   |
| 6              | 10.5  | 30    | 440   | 1:20  | 34.09±0.52                   |
| 7              | 11    | 20    | 550   | 1:20  | 42.84±0.65                   |
| 8              | 11    | 25    | 440   | 1:25  | 38.62±1.01                   |
| 9              | 11    | 30    | 495   | 1:15  | 39.85±1.40                   |
| k <sub>1</sub> | 33.53 | 36.47 | 34.51 | 36.26 |                              |
| k <sub>2</sub> | 35.98 | 36.86 | 36.48 | 36.92 |                              |
| k <sub>3</sub> | 40.44 | 36.62 | 38.96 | 36.77 |                              |
| R              | 6.91  | 0.39  | 4.45  | 0.66  |                              |

**Table S3.** Variance analysis of orthogonal test.

| Factors | Sum of square | Degree of freedom | Mean of square | <i>F</i> -value | <i>P</i> -value | Significant |
|---------|---------------|-------------------|----------------|-----------------|-----------------|-------------|
| A       | 211.02        | 2                 | 110.51         | 57.03           | 0.0001          | **          |
| B       | 0.71          | 2                 | 0.36           | 0.18            | 0.83            |             |
| C       | 89.62         | 2                 | 44.81          | 23.12           | 0.0001          | **          |
| D       | 2.18          | 2                 | 1.09           | 0.56            | 0.58            |             |
| Error   | 34.88         | 18                | 1.94           |                 |                 |             |
| Total   | 36613.        | 27                |                |                 |                 |             |
|         | 95            |                   |                |                 |                 |             |

\*\* means that the differences are extremely significant,  $P < 0.01$ .

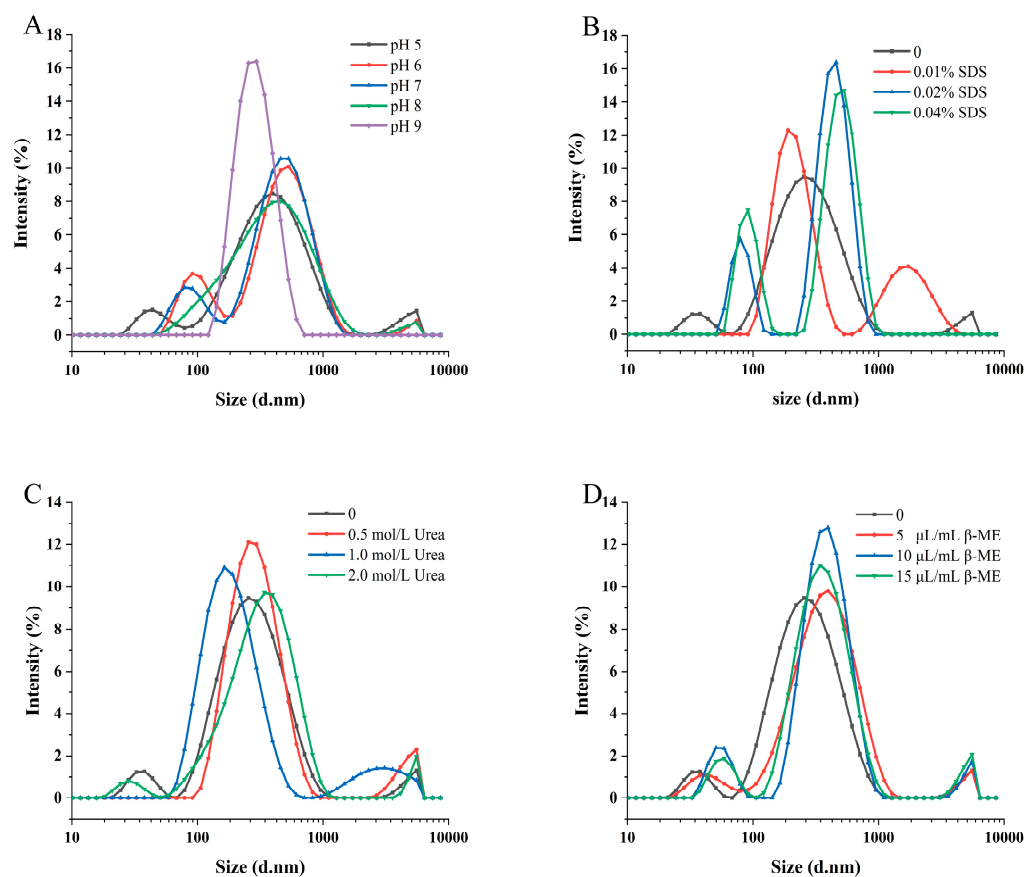

**Figure S1.** Effects of different dissociation agents on particle size distribution of U-DRVP. (A) pH, (B) SDS, (C) urea, and (D)  $\beta$ -ME. **Note:** U-DRVP, *D. rubrovolvata* volva proteins extracted by UAE.

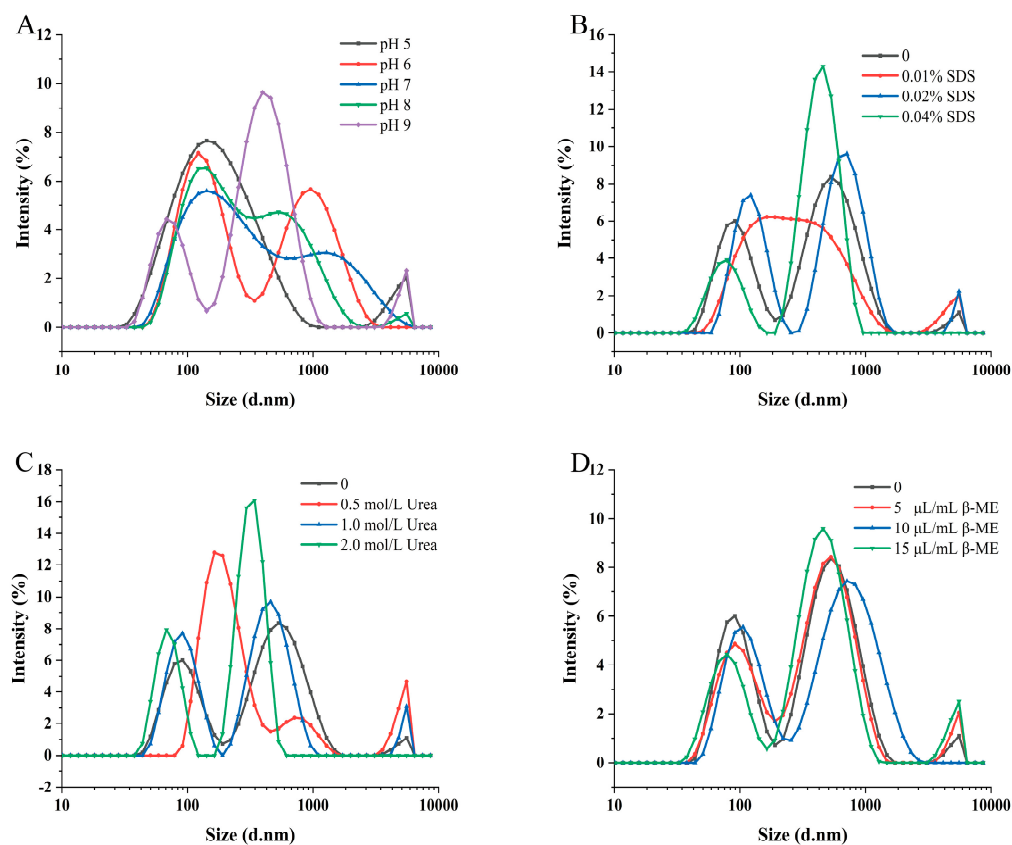

**Figure S2.** Effects of different dissociation agents on particle size distribution of C-DRVP. (A) pH, (B) SDS, (C) urea, and (D)  $\beta$ -ME. **Note:** C-DRVP, *D. rubrovolvata* volva proteins extracted by conventional alkaline extraction without UAE.
